# Supplementary material for: Structural and Functional Insights into Human Nuclear Cyclophilins
Source: Preprints.org preprint supplement (doi:10.20944/preprints201811.0037.v1), 2018-11-02
Supplement: Supplementary file 1 [file supplementary]

## Sheet: ST1.bioinformatics
Gene Name	GenBank Accession	UniProt Accession	Sequence	# aa	MW (kDa)	pI	Domain 1	Boundary	PDB ID	Domain 2	Boundary	PDB ID	Spliceosomal Association	Cryo-EM structures
PPIA	NP_066953.1	P62937	MVNPTVFFDIAVDGEPLGRVSFELFADKVPKTAENFRALSTGEKGFGYKGSCFHRIIPGFMCQGGDFTRHNGTGGKSIYGEKFEDENFILKHTGPGILSMANAGPNTNGSQFFICTAKTEWLDGKHVVFGKVKEGMNIVEAMERFGSRNGKTSKKITIADCGQLE	165	18.012	7.68	PPI	1-165	1AK4, 1AWQ, 1AWR, 1AWS, 1AWT, 1AWU, 1AWV, 1BCK, 1CWA, 1CWB, 1CWC, 1CWF, 1CWH, 1CWI, 1CWJ, 1CWK, 1CWL, 1CWM, 1CWO, 1FGL, 1M63, 1M9C, 1M9D, 1M9E, 1M9F, 1M9X, 1M9Y, 1MF8, 1MIK, 1NMK, 1OCA, 1RMH, 1VBS, 1VBT, 1W8L, 1W8M, 1YND, 1ZKF, 2ALF, 2CPL, 2CYH, 2MS4, 2MZU, 2N0T, 2RMA, 2RMB, 2X25, 2X2A, 2X2C, 2X2D, 2XGY, 3CYH, 3CYS, 3K0M, 3K0N, 3K0O, 3K0P, 3K0Q, 3K0R, 3ODI, 3ODL, 3RDD, 4CYH, 4IPZ, 4N1M, 4N1N, 4N1…				n/a
PPIE	NP_006103	Q9UNP9	MATTKRVLYVGGLAEEVDDKVLHAAFIPFGDITDIQIPLDYETEKHRGFAFVEFELAEDAAAAIDNMNESELFGRTIRVNLAKPMRIKEGSSRPVWSDDDWLKKFSGKTLEENKEEEGSEPPKAETQEGEPIAKKARSNPQVYMDIKIGNKPAGRIQMLLRSDVVPMTAENFRCLCTHEKGFGFKGSSFHRIIPQFMCQGGDFTNHNGTGGKSIYGKKFDDENFILKHTGPGLLSMANSGPNTNGSQFFLTCDKTDWLDGKHVVFGEVTEGLDVLRQIEAQGSKDGKPKQKVIIADCGEYV	301	33.43	5.41	RRM	7-80	2CQB, 2KU7, 2KYX, 3LPY, 3MDF	PPI	143-299	1ZMF, 2R99, 3UCH, 5MQF	B, Bact, C, P complex	5MQF, 5YZG, 5Z56, 5Z57
PPIG	NP_004783.2	Q13427	MGIKVQRPRCFFDIAINNQPAGRVVFELFSDVCPKTCENFRCLCTGEKGTGKSTQKPLHYKSCLFHRVVKDFMVQGGDFSEGNGRGGESIYGGFFEDESFAVKHNKEFLLSMANRGKDTNGSQFFITTKPTPHLDGHHVVFGQVISGQEVVREIENQKTDAASKPFAEVRILSCGELIPKSKVKKEEKKRHKSSSSSSSSSSDSDSSSDSQSSSDSSDSESATEEKSKKRKKKHRKNSRKHKKEKKKRKKSKKSASSESEAENLEAQPQSTVRPEEIPPIPENRFLMRKSPPKADEKERKNRERERERECNPPNSQPASYQRRLLVTRSGRKIKGRGPRRYRTPSRSRSRDRFRRSETPPHWRQEMQRAQRMRVSSGERWIKGDKSELNEIKENQRSPV…	754	88.617	10.29	PPI	11-176	2GW2, 2WFI, 2WFJ	SR/RS repeats	540-639		C complex	5YZG
PPIH	NP_006338.1	O43447	MAVANSSPVNPVVFFDVSIGGQEVGRMKIELFADVVPKTAENFRQFCTGEFRKDGVPIGYKGSTFHRVIKDFMIQGGDFVNGDGTGVASIYRGPFADENFKLRHSAPGLLSMANSGPSTNGCQFFITCSKCDWLDGKHVVFGKIIDGLLVMRKIENVPTGPNNKPKLPVVISQCGEM	177	19.208	8.28	PPI	1-177	1MZW, 1QOI, 5O9Z				U4/U6 snRNP, tri-snRNP, B complex	5O9Z
PPIL1	NP_057143.1	Q9Y3C6	MAAIPPDSWQPPNVYLETSMGIIVLELYWKHAPKTCKNFAELARRGYYNGTKFHRIIKDFMIQGGDPTGTGRGGASIYGKQFEDELHPDLKFTGAGILAMANAGPDTNGSQFFVTLAPTQWLDGKHTIFGRVCQGIGMVNRVGMVETNSQDRPVDDVKIIKAYPSG	166	18.237	7.78	PPI	1-166	1XWN, 2K7N, 2X7K, 5MQF, 5XJC				B, Bact, C, P complex	5MQF, 5XJC, 5YZG, 5Z56, 5Z57, 6FF4
PPIL2	NP_001304925.1	Q13356	MGKRQHQKDKMYITCAEYTHFYGGKKPDLPQTNFRRLPFDHCSLSLQPFVYPVCTPDGIVFDLLNIVPWLKKYGTNPSNGEKLDGRSLIKLNFSKNSEGKYHCPVLFTVFTNNTHIVAVRTTGNVYAYEAVEQLNIKAKNFRDLLTDEPFSRQDIITLQDPTNLDKFNVSNFYHVKNNMKIIDPDEEKAKQDPSYYLKNTNAETRETLQELYKEFKGDEILAATMKAPEKKKVDKLNAAHYSTGKVSASFTSTAMVPETTHEAAAIDEDVLRYQFVKKKGYVRLHTNKGDLNLELHCDLTPKTCENFIRLCKKHYYDGTIFHRSIRNFVIQGGDPTGTGTGGESYWGKPFKDEFRPNLSHTGRGILSMANSGPNSNRSQFFITFRSCAYLDKKHTIFGR…	527	59.458	8.91	UBOX	42-101		PPI	281-433	1ZKC	Bact
PPIL3	NP_570981.1	Q9H2H8	MSVTLHTDVGDIKIEVFCERTPKTCENFLALCASNYYNGCIFHRNIKGFMVQTGDPTGTGRGGNSIWGKKFEDEYSEYLKHNVRGVVSMANNGPNTNGSQFFITYGKQPHLDMKYTVFGKVIDGLETLDELEKLPVNEKTYRPLNDVHIKDITIHANPFAQ	161	18.154	6.29	PPI	1-161	1XYH, 2OJU, 2OK3				C, P complex
PPWD1	NP_056157.1	Q96BP3	MAAESGSDFQQRRRRRRDPEEPEKTELSERELAVAVAVSQENDEENEERWVGPLPVEATLAKKRKVLEFERVYLDNLPSASMYERSYMHRDVITHVVCTKTDFIITASHDGHVKFWKKIEEGIEFVKHFRSHLGVIESIAVSSEGALFCSVGDDKAMKVFDVVNFDMINMLKLGYFPGQCEWIYCPGDAISSVAASEKSTGKIFIYDGRGDNQPLHIFDKLHTSPLTQIRLNPVYKAVVSSDKSGMIEYWTGPPHEYKFPKNVNWEYKTDTDLYEFAKCKAYPTSVCFSPDGKKIATIGSDRKVRIFRFVTGKLMRVFDESLSMFTELQQMRQQLPDMEFGRRMAVERELEKVDAVRLINIVFDETGHFVLYGTMLGIKVINVETNRCVRILGKQENIR…	646	73.575	6.7	WD40	80-453		PPI	490-645	2A2N	C, P complex	5YZG
CWC27	NP_005860.2	Q6UX04	MSNIYIQEPPTNGKVLLKTTAGDIDIELWSKEAPKACRNFIQLCLEAYYDNTIFHRVVPGFIVQGGDPTGTGSGGESIYGAPFKDEFHSRLRFNRRGLVAMANAGSHDNGSQFFFTLGRADELNNKHTIFGKVTGDTVYNMLRLSEVDIDDDERPHNPHKIKSCEVLFNPFDDIIPREIKRLKKEKPEEEVKKLKPKGTKNFSLLSFGEEAEEEEEEVNRVSQSMKGKSKSSHDLLKDDPHLSSVPVVESEKGDAPDLVDDGEDESAEHDEYIDGDEKNLMRERIAKKLKKDTSANVKSAGEGEVEKKSVSRSEELRKEARQLKRELLAAKQKKVENAAKQAEKRSEEEEAPPDGAVAEYRREKQKYEALRKQQSKKGTSREDQTLALLNQFKSKLTQA…	472	53.847	5.6	PPI	14-166	2HQ6, 4R3E	coiled-coil	306-351		Bact, C, P complex	5Z56, 5Z58, 6FF4
EXPASY protparam for protein properties			https://web.expasy.org/protparam/
UNIPROT for accession numbers			https://www.uniprot.org/
SMART DOMAIN for domains			http://smart.embl-heidelberg.de/
spliceosomedb for presence in spliceosome.			http://spliceosomedb.ucsc.edu/
